# Supplementary material for: Drug Target Identification with Machine Learning: How to Choose Negative Examples
Source: MDPI journal article supplement (doi:10.3390/ijms22105118), 2021-05-12
Supplement: s1 [file s1]

Supplementary Materials:

1. Flowchart of nested Cross Validation

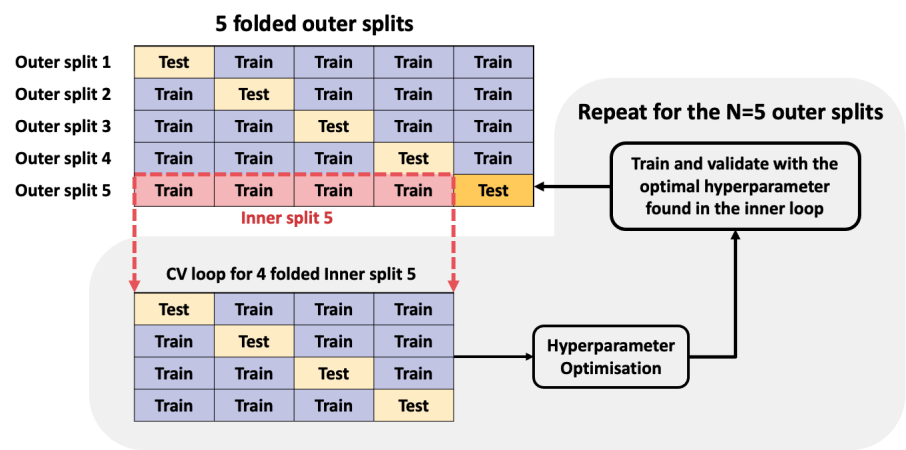

Figure S1. Nested Cross Validation Workflow with N=5 outer splits.
